# Supplementary material for: Screening and verification of proteins that interact with the anthocyanin-related transcription factor PbrMYB114 in ‘Yuluxiang’ pear
Source: PeerJ journal article supplement (doi:10.7717/peerj.17540), 2024-06-14

Figur 1A The PbrMYB114 cDNA fragment

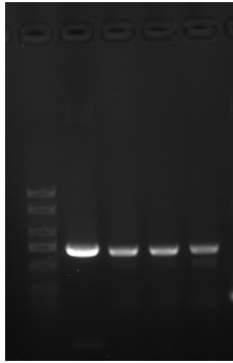

Figur 2A Evaluation of the integrity of total RNA from 'Yuluxiang' pears;

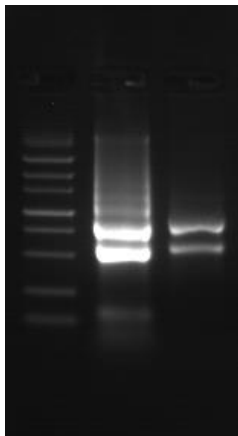

Figur 2B Double-stranded cDNA was evaluated by 1% agarose gel electrophoresis following normalization.

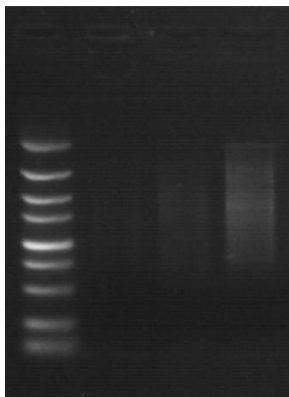

Figur 2D PCR-based assessment of insertion fragments

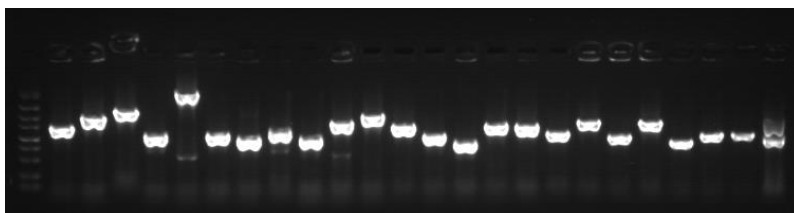

Supplement: Original_Images.pdf [file Original_Images.pdf]
