# Supplementary material for: Screening and verification of proteins that interact with the anthocyanin-related transcription factor PbrMYB114 in ‘Yuluxiang’ pear
Source: PeerJ. 2024 Jun 14;12:e17540. doi: 10.7717/peerj.17540 (PMC11182023; doi:10.7717/peerj.17540)
Supplement: Supplemental Information 3 [file peerj-12-17540-s003.xls]

## Sheet: Results
Position	Sample Name	Gene Name	Cq	Call	Excluded	Sample Type	Dye
A5	conntrol	actin	20.55	Positive	Unchecked	Unknown	SYBR Green I
A6	MYB114	actin	20.03	Positive	Unchecked	Unknown	SYBR Green I
A7	bHLH3	actin	21.98	Positive	Unchecked	Unknown	SYBR Green I
A8	MYB114-bHLH3	actin	20.03	Positive	Unchecked	Unknown	SYBR Green I
B5	conntrol	actin	20.75	Positive	Unchecked	Unknown	SYBR Green I
B6	MYB114	actin	22.03	Positive	Unchecked	Unknown	SYBR Green I
B7	bHLH3	actin	22.03	Positive	Unchecked	Unknown	SYBR Green I
B8	MYB114-bHLH3	actin	20.21	Positive	Unchecked	Unknown	SYBR Green I
C5	conntrol	MYB114	20.63	Positive	Unchecked	Unknown	SYBR Green I
C6	MYB114	MYB114	20.83	Positive	Unchecked	Unknown	SYBR Green I
C7	MYB114-bHLH3	MYB114	19.03	Positive	Unchecked	Unknown	SYBR Green I
D5	conntrol	MYB114	20.7	Positive	Unchecked	Unknown	SYBR Green I
D6	MYB114	MYB114	21.2	Positive	Unchecked	Unknown	SYBR Green I
D7	MYB114-bHLH3	MYB114	18.91	Positive	Unchecked	Unknown	SYBR Green I
E5	conntrol	MYB114	20.67	Positive	Unchecked	Unknown	SYBR Green I
E6	MYB114	MYB114	21.03	Positive	Unchecked	Unknown	SYBR Green I
E7	MYB114-bHLH3	MYB114	19.11	Positive	Unchecked	Unknown	SYBR Green I
F5	conntrol	bHLH3	20.41	Positive	Unchecked	Unknown	SYBR Green I
F6	bHLH3	bHLH3	20.96	Positive	Unchecked	Unknown	SYBR Green I
F7	MYB114-bHLH3	bHLH3	19.03	Positive	Unchecked	Unknown	SYBR Green I
G5	conntrol	bHLH3	20.57	Positive	Unchecked	Unknown	SYBR Green I
G6	bHLH3	bHLH3	21	Positive	Unchecked	Unknown	SYBR Green I
G7	MYB114-bHLH3	bHLH3	18.86	Positive	Unchecked	Unknown	SYBR Green I
H5	conntrol	bHLH3	20.71	Positive	Unchecked	Unknown	SYBR Green I
H6	bHLH3	bHLH3	20.87	Positive	Unchecked	Unknown	SYBR Green I
H7	MYB114-bHLH3	bHLH3	18.65	Positive	Unchecked	Unknown	SYBR Green I

## Sheet: Analysis Results
gene	transient overexpression	CT value	SD	Actin	CT value	SD	ΔCT	ΔCT	ΔΔCT	relative expression	relative expression	SD
MYB114	Control	20.63	0.0351188	Control	20.55	0.1	0.08	0.0166667	0.0633333	0.95705	1.00068	0.045196
		20.7			20.75		-0.05	0.0166667	-0.0666667	1.04729
		20.67			20.65		0.02	0.0166667	0.00333333	0.997692
	MYB114	20.83	0.185203	bHLH3	21.98	0.025	-1.15	0.0166667	-1.16667	2.24492	2.01058	0.22411
		21.2			22.03		-0.83	0.0166667	-0.846667	1.79834
		21.03			22.005		-0.975	0.0166667	-0.991667	1.98848
	MYB114+bHLH3	19.03	0.100664	MYB114+bHLH3	20.03	0.09	-1	0.0166667	-1.01667	2.02324	2.18382	0.266034
		18.91			20.21		-1.3	0.0166667	-1.31667	2.4909
		19.11			20.12		-1.01	0.0166667	-1.02667	2.03731
bHLH3	Control	20.41	0.150111	Control	20.55	0.1	-0.14	-0.0866667	-0.0533333	1.03766	1.00261	0.0872022
		20.57			20.75		-0.18	-0.0866667	-0.0933333	1.06683
		20.71			20.65		0.06	-0.0866667	0.146667	0.903335
	bHLH3	20.96	0.0665833	bHLH3	21.98	0.025	-1.02	-0.0866667	-0.933333	1.90968	1.96693	0.0879015
		21			22.03		-1.03	-0.0866667	-0.943333	1.92297
		20.87			22.005		-1.135	-0.0866667	-1.04833	2.06814
	MYB114+bHLH3	19.03	0.190351	MYB114+bHLH3	20.03	0.09	-1	-0.0866667	-0.913333	1.88339	2.29753	0.373458
		18.86			20.21		-1.35	-0.0866667	-1.26333	2.4005
		18.65			20.12		-1.47	-0.0866667	-1.38333	2.6087
