# Supplementary material for: Screening and verification of proteins that interact with the anthocyanin-related transcription factor PbrMYB114 in ‘Yuluxiang’ pear
Source: PeerJ. 2024 Jun 14;12:e17540. doi: 10.7717/peerj.17540 (PMC11182023; doi:10.7717/peerj.17540)
Supplement: Supplemental Information 4 [file peerj-12-17540-s004.xls]

## Sheet: Sheet1
ITEM TO CHECK	IMPORTANCE	CHECKLIST
EXPERIMENTAL DESIGN
Definition of experimental and control groups	E	117-118
Number within each group	E	3
Assay carried out by core lab or investigator's lab?	D
Acknowledgement of authors' contributions	D
SAMPLE
Description	E	91-92
Volume/mass of sample processed	D
Microdissection or macrodissection	E	macrodissection
Processing procedure	E	92-93
If frozen - how and how quickly?	E	94-95
If fixed - with what, how quickly?	E	94-95
Sample storage conditions and duration (especially for FFPE samples)	E	94-95
NUCLEIC ACID EXTRACTION
Procedure and/or instrumentation	E	157-158
Name of kit and details of any modifications	E	157
Source of additional reagents used	D
Details of DNase or RNAse treatment	E	96-100
Contamination assessment (DNA or RNA)	E	96-100
Nucleic acid quantification	E	96-100
Instrument and method	E	96-100
Purity (A260/A280)	D
Yield	D
RNA integrity method/instrument	E	96-100
RIN/RQI or Cq of 3' and 5' transcripts	E	96-100
Electrophoresis traces	D
Inhibition testing (Cq dilutions, spike or other)	E	96-100
REVERSE TRANSCRIPTION
Complete reaction conditions	E	158-160
Amount of RNA and reaction volume	E	158-160
Priming oligonucleotide (if using GSP) and concentration	E	158-160
Reverse transcriptase and concentration	E	158-160
Temperature and time	E	158-160
Manufacturer of reagents and catalogue numbers	D
Cqs with and without RT	D*
Storage conditions of cDNA	D
qPCR TARGET INFORMATION
If multiplex, efficiency and LOD of each assay.	E	160-163
Sequence accession number	E	158-159
Location of amplicon	D
Amplicon length	E	158-159
In silico specificity screen (BLAST, etc)	E	160-163
Pseudogenes, retropseudogenes or other homologs?	D
Sequence alignment	D
Secondary structure analysis of amplicon	D
Location of each primer by exon or intron (if applicable)	E	160-163
What splice variants are targeted?	E	160-163
qPCR OLIGONUCLEOTIDES
Primer sequences	E	158-160
RTPrimerDB Identification Number	D
Probe sequences	D**
Location and identity of any modifications	E	158-160
Manufacturer of oligonucleotides	D
Purification method	D
qPCR PROTOCOL
Complete reaction conditions	E	160-163
Reaction volume and amount of cDNA/DNA	E	160-163
Primer, (probe), Mg++ and dNTP concentrations	E	160-163
Polymerase identity and concentration	E	160-163
Buffer/kit identity and manufacturer	E	160-163
Exact chemical constitution of the buffer	D
Additives (SYBR Green I, DMSO, etc.)	E	160-163
Manufacturer of plates/tubes and catalog number	D
Complete thermocycling parameters	E	160-163
Reaction setup (manual/robotic)	D
Manufacturer of qPCR instrument	E	160-163
qPCR VALIDATION
Evidence of optimisation (from gradients)	D
Specificity (gel, sequence, melt, or digest)	E	160-163
For SYBR Green I, Cq of the NTC	E	160-163
Standard curves with slope and y-intercept	E	160-163
PCR efficiency calculated from slope	E	160-163
Confidence interval for PCR efficiency or standard error	D
r2 of standard curve	E	160-163
Linear dynamic range	E	160-163
Cq variation at lower limit	E	160-163
Confidence intervals throughout range	D
Evidence for limit of detection	E	160-163
If multiplex, efficiency and LOD of each assay.	E	160-163
DATA ANALYSIS
qPCR analysis program (source, version)	E	162-163
Cq method determination	E	162-163
Outlier identification and disposition	E	162-163
Results of NTCs	E	163-167
Justification of number and choice of reference genes	E	163-167
Description of normalisation method	E	163-167
Number and concordance of biological replicates	D
Number and stage (RT or qPCR) of technical replicates	E	163-167
Repeatability (intra-assay variation)	E
Reproducibility (inter-assay variation, %CV)	D
Power analysis	D
Statistical methods for result significance	E	163-167
Software (source, version)	E	163-167
Cq or raw data submission using RDML	D
Table 1. MIQE checklist for authors, reviewers and editors. All essential information (E) must be submitted with the manuscript. Desirable
information (D) should be submitted if available. If using primers obtained from RTPrimerDB, information on qPCR target, oligonucleotides,
protocols and validation is available from that source.
*: Assessing the absence of DNA using a no RT assay is essential when first extracting RNA. Once the sample has been validated as
RDNA-free, inclusion of a no-RT control is desirable, but no longer essential.
**: Disclosure of the probe sequence is highly desirable and strongly encouraged. However, since not all commercial pre-designed assay
vendors provide this information, it cannot be an essential requirement. Use of such assays is advised against.
